# Supplementary material
Source: HighWire-hosted journal article supplement (http://www.cmaj.ca/highwire/filestream/59432/field_highwire_adjunct_files/0/collab-blake-1-at.pdf)
Supplement: collab-blake-1-at.pdf [file collab-blake-1-at.pdf]

## Appendix 1: References

1. *A national birthing initiative for Canada*. Ottawa (ON): Society of Obstetricians and Gynaecologists of Canada; 2008. Available: <http://sogc.org/wp-content/uploads/2012/09/BirthingStrategyVersioncJan2008.pdf> (accessed 2014 Apr. 10).
2. College of Family Physicians of Canada, Canadian Medical Association, Royal College of Physicians and Surgeons of Canada. *National Physician Survey, 2013*. Mississauga (ON): National Physician Survey; 2014. Available: <http://nationalphysiciansurvey.ca/surveys/2013-survey/full-downloads-2013> (accessed 2014 Apr. 14).
3. Sandall J, Soltani H, Gates S, et al. Midwife-led continuity models versus other models of care for childbearing women. *Cochrane Database Syst Rev* 2013;(8):CD004667.
4. Martin L. Midwife-led care best for babies and moms, researchers say: surveys suggest reassuring results, obstetrician says. *CBC News* 2014 Aug. 20. Available: [www.cbc.ca/news/health/midwife-led-care-best-for-babies-and-moms-researchers-say-1.1368417](http://www.cbc.ca/news/health/midwife-led-care-best-for-babies-and-moms-researchers-say-1.1368417) (accessed 2014 May 27).
5. *Guidelines and implementation tools for multidisciplinary collaborative primary maternity care models*. Ottawa (ON): Multidisciplinary Collaborative Primary Maternity Care Project; 2006.
6. Rogers J. Sustainability and collaboration in maternity care in Canada: dreams and obstacles. *Can J Rural Med* 2003;8:193-8.
7. Sorrells-Jones J, Weaver D. Knowledge workers and knowledge-intensive organizations, Part 3. Implications for preparing healthcare professionals. *J Nurs Adm* 1999;29:14-21.
